# Supplementary material for: Plasmids as Key Players in Acinetobacter Adaptation
Source: MDPI journal article supplement (doi:10.3390/ijms231810893), 2022-09-17
Supplement: s1 [file s1]

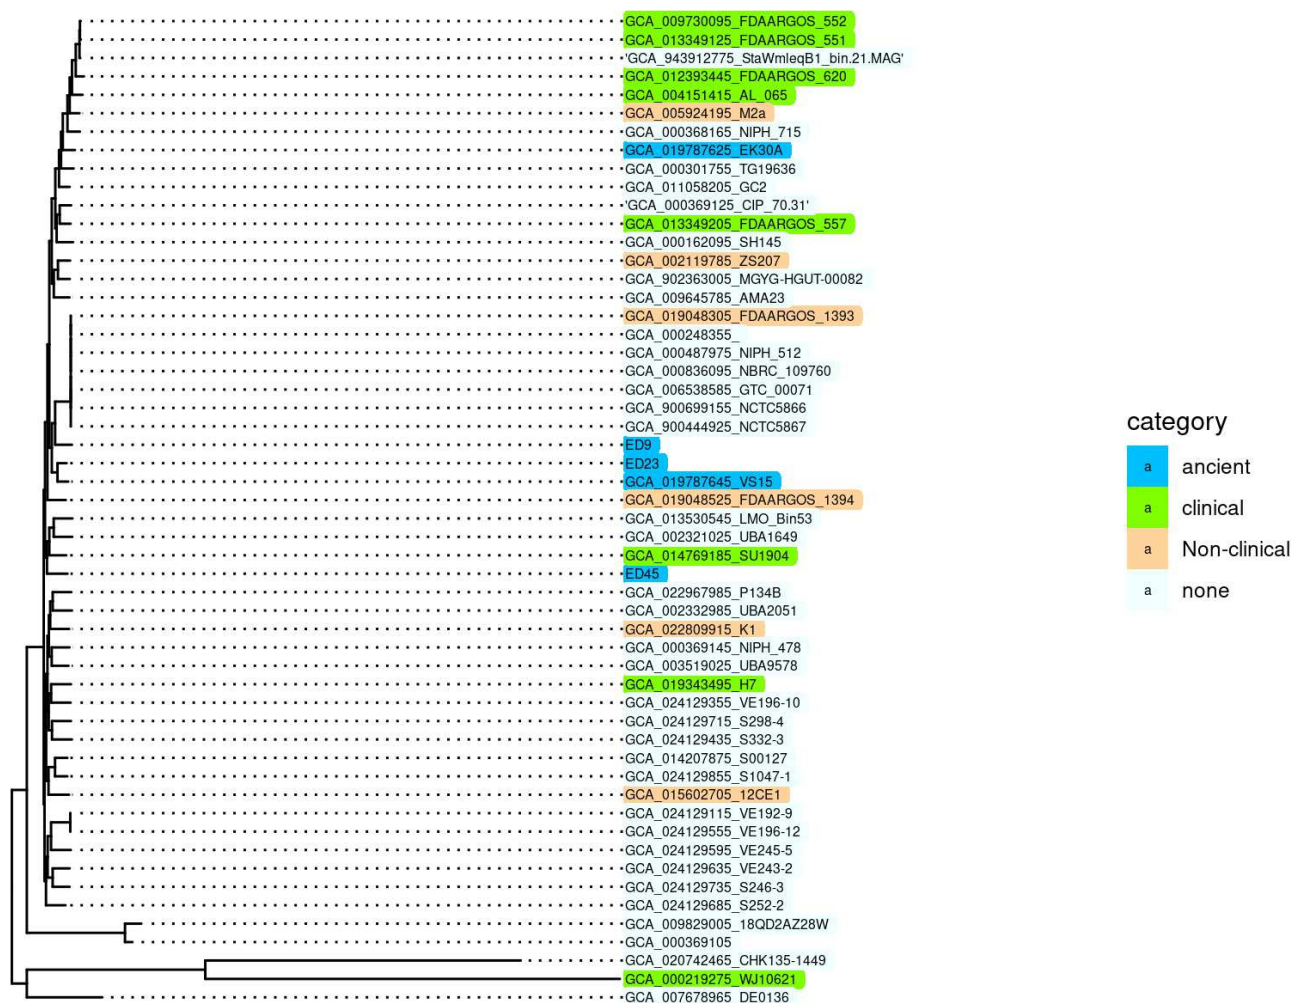

**Figure S1.** Genome-based phylogeny of *A. lwoffii*. The maximum likelihood tree is based on concatenated nucleotide sequences of single copy genes from all “*Acinetobacter*” genomes. It is clearly seen that the three strains in the lowest part of the tree do not belong to *A. lwoffii*.

**Table S1.** Clinical strains of *A. lwoffii* used for comparison with environmental strains

| Strain    | BioProject  | Source            |
|-----------|-------------|-------------------|
| SH145     | PRJNA38343  | Skin              |
| NIPH 715  | PRJNA183318 | Pus               |
| CIP 70.31 | PRJNA183262 | Gangrenous lesion |
| NIPH 478  | PRJNA183261 | Ear swab          |
| NIPH 512  | PRJNA219244 | Unknown           |
| TG19636   | PRJNA224116 | Urine             |

**Table S2.** Plasmids from permafrost *A. lwoffii* strains containing genes (operons) of heavy metals and antibiotic resistance

| Strain                                 | Plasmid          | Size, bp | Heavy metal resistance                  | Antibiotic resistance genes | Accession number |
|----------------------------------------|------------------|----------|-----------------------------------------|-----------------------------|------------------|
| <b>ED23-35</b> permafrost, depth 4,5 m | pALWED1.1        | 287,631  | <i>mer, chr, czc, nreB</i>              | <i>tet (H)</i>              | CP082144.1       |
|                                        | pALWED1. 3       | 16,071   | <i>chrBA</i>                            | –                           | CP082145.1       |
|                                        | <b>pALWED1.8</b> | 4,135    | -                                       | <i>aadA27</i>               | LN873256.1       |
| <b>ED43-25</b> permafrost, depth 2,9 m | pALWED2.1        | 190,039  | <i>mer, ars, cop</i>                    | -                           | KX426229.1       |
| <b>ED9-5A</b> permafrost, depth 6,5 m  | pALWED3.6        | 185,756  | <i>ars, cop, czs</i>                    | –                           | CP032290.2       |
|                                        | pALWED3.1        | 138,030  | <i>mer, ars, cop, czsx3;czsDx2;nreB</i> | –                           | CP083572.1       |
|                                        | pALWED3.5        | 16,561   | <i>chrAB</i>                            | -                           | CP083573.1       |
| <b>VS15</b> permafrost, depth 34,0 m   | pALWVS1.1        | 134,096  | <i>cop, czsA, czcDx2</i>                | –                           | CP080577.1       |
|                                        | <b>pALWED1.8</b> | 4,135    | -                                       | <i>aadA27</i>               | LN873256.1       |
| <b>EK30a</b> permafrost, depth 47,9 m  | pALWEK1.1        | 209,982  | <i>cop, czcA, czcD x2</i>               | –                           | CP032102.1       |
|                                        | pALWEK1.4        | 8,635    | –                                       | <i>cflA</i>                 | CP032107.1       |
|                                        | pALWEK1.5        | 8,227    | <i>chrBA</i>                            | –                           | CP080639.1       |
|                                        | <b>pALWED1.8</b> | 4,135    |                                         | <i>aadA27</i>               | LN873256.1       |

**Table S3.** Plasmids from modern *A. lwoffii* strains containing genes (operons) of heavy metals and antibiotic resistance

| Strain                                                                 | Plasmid     | Size (bp) | Heavy metal resistance             | Antibiotic resistance Genes                                                                                                                      | Accession number  |
|------------------------------------------------------------------------|-------------|-----------|------------------------------------|--------------------------------------------------------------------------------------------------------------------------------------------------|-------------------|
| <b>12CE1</b> Australia, digestive tract of <i>Penaeus plebejus</i>     | pR4WN_12CE1 | 270906    | <i>cop</i>                         | <i>sul1, qacE, aac(6')-1b4</i>                                                                                                                   | MT742180.1        |
| <b>FDAARG0S_1393</b> Germany, culture_collection                       | unnamed2    | 221423    | <i>cop, czc, arsHBC</i>            | -                                                                                                                                                | CP077338.1        |
|                                                                        | unnamed3    | 55306     | <i>chrAB, arsCBH, merEDQCPT R</i>  | -                                                                                                                                                | CP077339.1        |
| <b>FDAARG0S_1394</b> Germany, culture_collection                       | unnamed1    | 121296    | <i>cop, czc</i>                    | -                                                                                                                                                | CP077370.1        |
| <b>ZS207</b> Poland, microbial mats from Zloty Stok gold mine          | pMZS        | 186588    | <i>arsHBC; CusA/CzcA</i>           | -                                                                                                                                                | CP019144.2        |
| <b>M2a</b> Hungary, honey                                              | pAVAc98     | >27622    | <i>cop, arsHBC, chr, mer, czc*</i> | -                                                                                                                                                | MK993303          |
| <b>AL_065-1</b> Pakistan, bedside rail in hospital intensive care unit | pAL_065-2   | 284,005   | -                                  | APH(3'')-V1b GNAT, <i>sul1, qacE, aac(6')-1b4, arr3, blaNDM-ble, sul2-aph(3')-1bx2; blaNDM, ble, floR; aph(6)-1dx2; msr(E)-mph(E); aac(3)-2d</i> | CP078046.1        |
|                                                                        | pAL_065-3   | 158,191   | <i>cop, CusA/CzcA</i>              | -                                                                                                                                                | CP078047.1        |
|                                                                        | pAL_065-5   | 13776     | <i>chrBA</i>                       | -                                                                                                                                                | CP078049.1        |
| <b>H7</b> China, chickens                                              | *pH7-250    | 250175    | -                                  | APH(3')VIb, GNAT, <i>sul1x2,, qacE, aac(6')-1b4, arr3,, floR, msr(E))-mph(E)</i>                                                                 | CP072550.1        |
|                                                                        | pH7-68      | 68402     | <i>cop x2, czc, arsHBAC</i>        | -                                                                                                                                                | CP072552.1        |
|                                                                        | pH7-48      | 48843     |                                    | <i>cmlAfloR</i>                                                                                                                                  | CP072553.1        |
| <b>SU1904</b> , Japan, Homo sapience                                   | pSU1904ND M | 43651     | -                                  | <i>bleMBL, blaNDM-1; aphA6</i>                                                                                                                   | LC537594.1        |
| <b>JN49-1</b> , China, Homo sapience                                   | pNDM-JN01   | 41084     | -                                  | <i>bleMBL, blaNDM-1; aphA6</i>                                                                                                                   | KM210086.1        |
| <b>WJ10621</b> China, clinic                                           | pNDM-BJ01   | 47274     | -                                  | <i>bleMBL, blaNDM-1; aphA6</i>                                                                                                                   | JQ001791.1        |
| <b>FDAARG0S_551</b> USA, Homo sapience                                 | unnamed1    | 208308    | <i>cop, czcA</i>                   | -                                                                                                                                                | CP054821.1        |
|                                                                        | unnamed4    | 7854      | <i>chrBA</i>                       | -                                                                                                                                                | CP054825.1        |
| <b>FDAARG0S_552</b> USA, Homo sapience                                 | unnamed1    | 221520    | <i>cop, czcA</i>                   | -                                                                                                                                                | CP046295.1        |
| <b>FDAARG0S_557</b> USA, Homo sapience                                 | unnamed1    | 230914    | <i>cop, czsA</i>                   | -                                                                                                                                                | CP054804.1        |
| <b>FDAARG0S_620</b> USA, Homo sapience                                 | unnamed1    | 198971    | <i>cop, czsA</i>                   | -                                                                                                                                                | JAAXYZ010000001.1 |
|                                                                        | unnamed2    | 7739      | <i>chrBA</i>                       | -                                                                                                                                                | JAAXYZ010000002.1 |
